# Supplementary material for: Effects of Olea europaea L. Polyphenols on the Animal Welfare and Milk Quality in Dairy Cows
Source: MDPI journal article supplement (doi:10.3390/ani13203225), 2023-10-15
Supplement: s1 [file s1]

## Supplementary Materials

**Table S1.** Strategic Table showing the mean values of metabolic parameters reported in the figures 1-8.

| Parameters                       | Parity Class | Experimental Time  |                      |                    |                    |                    |                      |
|----------------------------------|--------------|--------------------|----------------------|--------------------|--------------------|--------------------|----------------------|
|                                  |              | T0                 | T1                   | T2                 | T3                 | T4                 | T5                   |
| Glucose<br>(mg/dl)               | P            | 64.12 <sup>a</sup> | 56.04 <sup>a/b</sup> | 42.89              | 49.38              | 37.37 <sup>b</sup> | 36.03 <sup>a</sup>   |
|                                  | S            | 54.43 <sup>b</sup> | 52.69 <sup>a</sup>   | 45.42              | 45.63              | 51.85 <sup>a</sup> | 45.67 <sup>b</sup>   |
|                                  | PL           | 69.97 <sup>a</sup> | 57.93 <sup>b</sup>   | 41.80              | 47.64              | 51.75 <sup>a</sup> | 33.60 <sup>a</sup>   |
| Triglycerides<br>(mg/dl)         | P            | 9.24 <sup>b</sup>  | 7.37                 | 3.60               | 3.15               | 3.64               | 10.49                |
|                                  | S            | 6.89 <sup>a</sup>  | 5.71                 | 4.99               | 3.52               | 5.29               | 11.27                |
|                                  | PL           | 6.55 <sup>a</sup>  | 6.08                 | 2.96               | 3.09               | 3.38               | 9.96                 |
| fT3<br>(pg/ml)                   | P            | 3.75 <sup>b</sup>  | 4.36                 | 3.47               | 4.09               | 3.42               | 3.77 <sup>b</sup>    |
|                                  | S            | 3.96 <sup>a</sup>  | 3.90                 | 3.87               | 3.70               | 3.26               | 3.20 <sup>a</sup>    |
|                                  | PL           | 3.71 <sup>a</sup>  | 3.88                 | 3.71               | 3.90               | 2.97               | 2.86 <sup>a</sup>    |
| fT4<br>(pg/ml)                   | P            | 0.92               | 0.88                 | 0.72               | 0.68 <sup>b</sup>  | 0.67 <sup>b</sup>  | 0.82 <sup>a</sup>    |
|                                  | S            | 0.87               | 0.80                 | 0.77               | 0.82 <sup>a</sup>  | 0.98 <sup>a</sup>  | 0.69 <sup>b</sup>    |
|                                  | PL           | 0.90               | 0.93                 | 0.79               | 0.79 <sup>a</sup>  | 1.18 <sup>c</sup>  | 0.86 <sup>a</sup>    |
| 17 $\beta$ -Estradiol<br>(pg/ml) | P            | 64.78 <sup>a</sup> | 50.45                | 68.16              | 77.81 <sup>a</sup> | 60.29              | 148.54 <sup>a</sup>  |
|                                  | S            | 37.88 <sup>b</sup> | 52.20                | 63.68              | 54.53 <sup>b</sup> | 60.16              | 85.39 <sup>b</sup>   |
|                                  | PL           | 29.36 <sup>c</sup> | 44.71                | 61.83              | 40.66 <sup>c</sup> | 60.78              | 125.27 <sup>a</sup>  |
| ACTH<br>(pg/ml)                  | P            | 19.37 <sup>a</sup> | 19.96 <sup>a</sup>   | 18.24 <sup>a</sup> | 18.72 <sup>a</sup> | 22.92 <sup>a</sup> | 25.45 <sup>a</sup>   |
|                                  | S            | 24.03 <sup>a</sup> | 26.07 <sup>b</sup>   | 26.55 <sup>b</sup> | 29.24 <sup>b</sup> | 29.93 <sup>a</sup> | 31.09 <sup>a</sup>   |
|                                  | PL           | 35.54 <sup>b</sup> | 37.49 <sup>c</sup>   | 38.82 <sup>c</sup> | 36.09 <sup>c</sup> | 37.94 <sup>b</sup> | 43.70 <sup>b</sup>   |
| Cortisol<br>(ng/ml)              | P            | 6.33 <sup>a</sup>  | 4.61 <sup>a</sup>    | 4.94 <sup>a</sup>  | 4.74               | 5.07 <sup>a</sup>  | 10.29 <sup>b</sup>   |
|                                  | S            | 13.23 <sup>b</sup> | 13.68 <sup>b</sup>   | 11.13 <sup>b</sup> | 10.03 <sup>b</sup> | 8.19 <sup>a</sup>  | 17.31 <sup>a</sup>   |
|                                  | PL           | 20.03 <sup>c</sup> | 19.03 <sup>c</sup>   | 16.73 <sup>c</sup> | 16.64 <sup>c</sup> | 18.66 <sup>b</sup> | 23.30 <sup>a</sup>   |
| Prolactin<br>(ng/ml)             | P            | 1.55               | 1.43                 | 1.63               | 1.72               | 2.03               | 2.46                 |
|                                  | S            | 2.19               | 2.44                 | 2.37               | 2.80               | 2.89               | 2.50                 |
|                                  | PL           | 1.99               | 2.90                 | 2.33               | 2.39               | 2.70               | 2.84                 |
| Oxytocin<br>(pg/ml)              | P            | 40.92 <sup>a</sup> | 32.04 <sup>b</sup>   | 25.28 <sup>a</sup> | 19.78              | 19.54              | 23.82 <sup>a/b</sup> |
|                                  | S            | 33.47 <sup>a</sup> | 22.80 <sup>a</sup>   | 25.64 <sup>a</sup> | 20.85              | 20.75              | 27.00 <sup>a</sup>   |
|                                  | PL           | 46.76 <sup>a</sup> | 20.08 <sup>a</sup>   | 17.73 <sup>b</sup> | 22.78              | 21.35              | 19.37 <sup>b</sup>   |

**Table S2.** Summary results Two-way Anova (Tukey test) of milk fatty acids

| Summary results Two-way ANOVA     |                          |           |                          |           |                          |
|-----------------------------------|--------------------------|-----------|--------------------------|-----------|--------------------------|
| Tukey's multiple comparisons test |                          |           |                          |           |                          |
| <b>C 14:0</b>                     |                          |           |                          |           |                          |
| P                                 | Statistical Significance | S         | Statistical Significance | PL        | Statistical Significance |
| T0 vs. T1                         | ns                       | T0 vs. T1 | ***                      | T0 vs. T1 | ***                      |
| T0 vs. T2                         | ns                       | T0 vs. T2 | ***                      | T0 vs. T2 | ***                      |
| T0 vs. T3                         | ns                       | T0 vs. T3 | ***                      | T0 vs. T3 | ***                      |
| T0 vs. T4                         | *                        | T0 vs. T4 | ***                      | T0 vs. T4 | ***                      |
| T0 vs. T5                         | **                       | T0 vs. T5 | ***                      | T0 vs. T5 | ***                      |
| T1 vs. T2                         | ns                       | T1 vs. T2 | ***                      | T1 vs. T2 | ns                       |
| T1 vs. T3                         | ns                       | T1 vs. T3 | ***                      | T1 vs. T3 | ***                      |
| T1 vs. T4                         | ns                       | T1 vs. T4 | ***                      | T1 vs. T4 | ***                      |
| T1 vs. T5                         | *                        | T1 vs. T5 | ***                      | T1 vs. T5 | ***                      |
| T2 vs. T3                         | ns                       | T2 vs. T3 | ***                      | T2 vs. T3 | ***                      |
| T2 vs. T4                         | ns                       | T2 vs. T4 | ***                      | T2 vs. T4 | ***                      |
| T2 vs. T5                         | ns                       | T2 vs. T5 | ***                      | T2 vs. T5 | ***                      |
| T3 vs. T4                         | ns                       | T3 vs. T4 | ***                      | T3 vs. T4 | ***                      |
| T3 vs. T5                         | ns                       | T3 vs. T5 | ***                      | T3 vs. T5 | ***                      |
| T4 vs. T5                         | ns                       | T4 vs. T5 | **                       | T4 vs. T5 | ***                      |
| <b>C 16:0</b>                     |                          |           |                          |           |                          |
| P                                 | Statistical Significance | S         | Statistical Significance | PL        | Statistical Significance |
| T0 vs. T1                         | ns                       | T0 vs. T1 | ***                      | T0 vs. T1 | ***                      |
| T0 vs. T2                         | ns                       | T0 vs. T2 | ***                      | T0 vs. T2 | ***                      |
| T0 vs. T3                         | ***                      | T0 vs. T3 | ***                      | T0 vs. T3 | ***                      |
| T0 vs. T4                         | ***                      | T0 vs. T4 | ***                      | T0 vs. T4 | ***                      |
| T0 vs. T5                         | ***                      | T0 vs. T5 | ***                      | T0 vs. T5 | ***                      |
| T1 vs. T2                         | ns                       | T1 vs. T2 | ***                      | T1 vs. T2 | ns                       |

|           |     |
|-----------|-----|
| T1 vs. T3 | *** |
| T1 vs. T4 | *** |
| T1 vs. T5 | *** |
| T2 vs. T3 | *** |
| T2 vs. T4 | *** |
| T2 vs. T5 | *** |
| T3 vs. T4 | *** |
| T3 vs. T5 | *** |
| T4 vs. T5 | *   |

|           |     |
|-----------|-----|
| T1 vs. T3 | *** |
| T1 vs. T4 | *** |
| T1 vs. T5 | *** |
| T2 vs. T3 | *** |
| T2 vs. T4 | *** |
| T2 vs. T5 | *** |
| T3 vs. T4 | ns  |
| T3 vs. T5 | *   |
| T4 vs. T5 | ns  |

|           |     |
|-----------|-----|
| T1 vs. T3 | *** |
| T1 vs. T4 | *** |
| T1 vs. T5 | *** |
| T2 vs. T3 | *** |
| T2 vs. T4 | *** |
| T2 vs. T5 | *** |
| T3 vs. T4 | *** |
| T3 vs. T5 | *** |
| T4 vs. T5 | ns  |

### C 16:1 n7t

| P         | Statistical Significance |
|-----------|--------------------------|
| T0 vs. T1 | ***                      |
| T0 vs. T2 | ***                      |
| T0 vs. T3 | ***                      |
| T0 vs. T4 | ***                      |
| T0 vs. T5 | ***                      |
| T1 vs. T2 | ***                      |
| T1 vs. T3 | ***                      |
| T1 vs. T4 | ***                      |
| T1 vs. T5 | ***                      |
| T2 vs. T3 | ***                      |
| T2 vs. T4 | ***                      |
| T2 vs. T5 | ***                      |
| T3 vs. T4 | **                       |
| T3 vs. T5 | ***                      |
| T4 vs. T5 | ***                      |

| S         | Statistical Significance |
|-----------|--------------------------|
| T0 vs. T1 | ns                       |
| T0 vs. T2 | **                       |
| T0 vs. T3 | ***                      |
| T0 vs. T4 | ***                      |
| T0 vs. T5 | ***                      |
| T1 vs. T2 | ns                       |
| T1 vs. T3 | ***                      |
| T1 vs. T4 | ***                      |
| T1 vs. T5 | ***                      |
| T2 vs. T3 | ***                      |
| T2 vs. T4 | ***                      |
| T2 vs. T5 | ***                      |
| T3 vs. T4 | ***                      |
| T3 vs. T5 | ***                      |
| T4 vs. T5 | ns                       |

| PL        | Statistical Significance |
|-----------|--------------------------|
| T0 vs. T1 | ns                       |
| T0 vs. T2 | ns                       |
| T0 vs. T3 | ***                      |
| T0 vs. T4 | ***                      |
| T0 vs. T5 | ***                      |
| T1 vs. T2 | ns                       |
| T1 vs. T3 | ***                      |
| T1 vs. T4 | ***                      |
| T1 vs. T5 | ***                      |
| T2 vs. T3 | **                       |
| T2 vs. T4 | ***                      |
| T2 vs. T5 | ***                      |
| T3 vs. T4 | ns                       |
| T3 vs. T5 | ***                      |
| T4 vs. T5 | ns                       |

### C 16:1 n7

| P         | Statistical Significance |
|-----------|--------------------------|
| T0 vs. T1 | ns                       |
| T0 vs. T2 | *                        |
| T0 vs. T3 | **                       |

| S         | Statistical Significance |
|-----------|--------------------------|
| T0 vs. T1 | *                        |
| T0 vs. T2 | ***                      |
| T0 vs. T3 | ***                      |

| PL        | Statistical Significance |
|-----------|--------------------------|
| T0 vs. T1 | ns                       |
| T0 vs. T2 | ns                       |
| T0 vs. T3 | ***                      |

|           |     |
|-----------|-----|
| T0 vs. T4 | *** |
| T0 vs. T5 | *** |
| T1 vs. T2 | ns  |
| T1 vs. T3 | ns  |
| T1 vs. T4 | ns  |
| T1 vs. T5 | *   |
| T2 vs. T3 | ns  |
| T2 vs. T4 | ns  |
| T2 vs. T5 | ns  |
| T3 vs. T4 | ns  |
| T3 vs. T5 | ns  |
| T4 vs. T5 | ns  |

|           |     |
|-----------|-----|
| T0 vs. T4 | *** |
| T0 vs. T5 | *** |
| T1 vs. T2 | *** |
| T1 vs. T3 | *** |
| T1 vs. T4 | *** |
| T1 vs. T5 | *** |
| T2 vs. T3 | *** |
| T2 vs. T4 | *** |
| T2 vs. T5 | *** |
| T3 vs. T4 | *** |
| T3 vs. T5 | *** |
| T4 vs. T5 | *** |

|           |     |
|-----------|-----|
| T0 vs. T4 | *** |
| T0 vs. T5 | *** |
| T1 vs. T2 | ns  |
| T1 vs. T3 | *** |
| T1 vs. T4 | *** |
| T1 vs. T5 | *** |
| T2 vs. T3 | *   |
| T2 vs. T4 | *** |
| T2 vs. T5 | *** |
| T3 vs. T4 | **  |
| T3 vs. T5 | *** |
| T4 vs. T5 | **  |

#### C 18:0

| P         | Statistical Significance |
|-----------|--------------------------|
| T0 vs. T1 | ***                      |
| T0 vs. T2 | ***                      |
| T0 vs. T3 | ***                      |
| T0 vs. T4 | ***                      |
| T0 vs. T5 | ***                      |
| T1 vs. T2 | ns                       |
| T1 vs. T3 | ***                      |
| T1 vs. T4 | ***                      |
| T1 vs. T5 | ***                      |
| T2 vs. T3 | ***                      |
| T2 vs. T4 | ***                      |
| T2 vs. T5 | ***                      |
| T3 vs. T4 | ***                      |
| T3 vs. T5 | ***                      |
| T4 vs. T5 | ***                      |

| S         | Statistical Significance |
|-----------|--------------------------|
| T0 vs. T1 | ***                      |
| T0 vs. T2 | ***                      |
| T0 vs. T3 | ***                      |
| T0 vs. T4 | ***                      |
| T0 vs. T5 | ***                      |
| T1 vs. T2 | ***                      |
| T1 vs. T3 | ***                      |
| T1 vs. T4 | ***                      |
| T1 vs. T5 | ***                      |
| T2 vs. T3 | ***                      |
| T2 vs. T4 | ***                      |
| T2 vs. T5 | ***                      |
| T3 vs. T4 | ***                      |
| T3 vs. T5 | ***                      |
| T4 vs. T5 | ***                      |

| PL        | Statistical Significance |
|-----------|--------------------------|
| T0 vs. T1 | ***                      |
| T0 vs. T2 | ***                      |
| T0 vs. T3 | ***                      |
| T0 vs. T4 | ***                      |
| T0 vs. T5 | ***                      |
| T1 vs. T2 | **                       |
| T1 vs. T3 | ***                      |
| T1 vs. T4 | ***                      |
| T1 vs. T5 | ***                      |
| T2 vs. T3 | ***                      |
| T2 vs. T4 | ***                      |
| T2 vs. T5 | ***                      |
| T3 vs. T4 | ***                      |
| T3 vs. T5 | ***                      |
| T4 vs. T5 | ***                      |

#### C 18:1 n9

| P | Statistical Significance |
|---|--------------------------|
|---|--------------------------|

| S | Statistical Significance |
|---|--------------------------|
|---|--------------------------|

| PL | Statistical Significance |
|----|--------------------------|
|----|--------------------------|

|           |     |
|-----------|-----|
| T0 vs. T1 | ns  |
| T0 vs. T2 | ns  |
| T0 vs. T3 | *** |
| T0 vs. T4 | *** |
| T0 vs. T5 | *** |
| T1 vs. T2 | ns  |
| T1 vs. T3 | *** |
| T1 vs. T4 | *** |
| T1 vs. T5 | *** |
| T2 vs. T3 | *** |
| T2 vs. T4 | *** |
| T2 vs. T5 | *** |
| T3 vs. T4 | **  |
| T3 vs. T5 | *** |
| T4 vs. T5 | ns  |

|           |     |
|-----------|-----|
| T0 vs. T1 | *** |
| T0 vs. T2 | *** |
| T0 vs. T3 | *** |
| T0 vs. T4 | *** |
| T0 vs. T5 | *** |
| T1 vs. T2 | *** |
| T1 vs. T3 | *** |
| T1 vs. T4 | *** |
| T1 vs. T5 | *** |
| T2 vs. T3 | *** |
| T2 vs. T4 | *** |
| T2 vs. T5 | *** |
| T3 vs. T4 | *** |
| T3 vs. T5 | *** |
| T4 vs. T5 | ns  |

|           |     |
|-----------|-----|
| T0 vs. T1 | *** |
| T0 vs. T2 | *** |
| T0 vs. T3 | *** |
| T0 vs. T4 | *** |
| T0 vs. T5 | *** |
| T1 vs. T2 | **  |
| T1 vs. T3 | *** |
| T1 vs. T4 | *** |
| T1 vs. T5 | *** |
| T2 vs. T3 | *** |
| T2 vs. T4 | *** |
| T2 vs. T5 | *** |
| T3 vs. T4 | *** |
| T3 vs. T5 | *** |
| T4 vs. T5 | *** |

# C 18:2 n6

| P         | Statistical Significance |
|-----------|--------------------------|
| T0 vs. T1 | ns                       |
| T0 vs. T2 | ns                       |
| T0 vs. T3 | **                       |
| T0 vs. T4 | ***                      |
| T0 vs. T5 | ***                      |
| T1 vs. T2 | ns                       |
| T1 vs. T3 | ns                       |
| T1 vs. T4 | ***                      |
| T1 vs. T5 | ***                      |
| T2 vs. T3 | ns                       |
| T2 vs. T4 | ***                      |
| T2 vs. T5 | ***                      |
| T3 vs. T4 | ***                      |
| T3 vs. T5 | ***                      |
| T4 vs. T5 | ns                       |

| S         | Statistical Significance |
|-----------|--------------------------|
| T0 vs. T1 | ***                      |
| T0 vs. T2 | ***                      |
| T0 vs. T3 | ***                      |
| T0 vs. T4 | ***                      |
| T0 vs. T5 | ***                      |
| T1 vs. T2 | ns                       |
| T1 vs. T3 | ***                      |
| T1 vs. T4 | ***                      |
| T1 vs. T5 | ***                      |
| T2 vs. T3 | ***                      |
| T2 vs. T4 | ***                      |
| T2 vs. T5 | ***                      |
| T3 vs. T4 | ***                      |
| T3 vs. T5 | ***                      |
| T4 vs. T5 | ***                      |

| PL        | Statistical Significance |
|-----------|--------------------------|
| T0 vs. T1 | ***                      |
| T0 vs. T2 | ***                      |
| T0 vs. T3 | ***                      |
| T0 vs. T4 | ***                      |
| T0 vs. T5 | ***                      |
| T1 vs. T2 | ns                       |
| T1 vs. T3 | ***                      |
| T1 vs. T4 | ***                      |
| T1 vs. T5 | ***                      |
| T2 vs. T3 | ***                      |
| T2 vs. T4 | ***                      |
| T2 vs. T5 | ***                      |
| T3 vs. T4 | **                       |
| T3 vs. T5 | ***                      |
| T4 vs. T5 | ***                      |

**C 18:3 n6**

| P         | Statistical Significance | S         | Statistical Significance | PL        | Statistical Significance |
|-----------|--------------------------|-----------|--------------------------|-----------|--------------------------|
| T0 vs. T1 | ns                       | T0 vs. T1 | ***                      | T0 vs. T1 | ***                      |
| T0 vs. T2 | ns                       | T0 vs. T2 | ***                      | T0 vs. T2 | ***                      |
| T0 vs. T3 | ns                       | T0 vs. T3 | ***                      | T0 vs. T3 | ***                      |
| T0 vs. T4 | ns                       | T0 vs. T4 | ***                      | T0 vs. T4 | ***                      |
| T0 vs. T5 | ns                       | T0 vs. T5 | ***                      | T0 vs. T5 | ***                      |
| T1 vs. T2 | ns                       | T1 vs. T2 | ns                       | T1 vs. T2 | ns                       |
| T1 vs. T3 | ns                       | T1 vs. T3 | ns                       | T1 vs. T3 | ns                       |
| T1 vs. T4 | ns                       | T1 vs. T4 | ***                      | T1 vs. T4 | ***                      |
| T1 vs. T5 | ns                       | T1 vs. T5 | ***                      | T1 vs. T5 | ***                      |
| T2 vs. T3 | ns                       | T2 vs. T3 | ns                       | T2 vs. T3 | ns                       |
| T2 vs. T4 | ns                       | T2 vs. T4 | **                       | T2 vs. T4 | ***                      |
| T2 vs. T5 | ns                       | T2 vs. T5 | ***                      | T2 vs. T5 | ***                      |
| T3 vs. T4 | ns                       | T3 vs. T4 | *                        | T3 vs. T4 | ***                      |
| T3 vs. T5 | ns                       | T3 vs. T5 | **                       | T3 vs. T5 | ***                      |
| T4 vs. T5 | ns                       | T4 vs. T5 | ns                       | T4 vs. T5 | ns                       |

**C 20:1 n9**

| P         | Statistical Significance | S         | Statistical Significance | PL        | Statistical Significance |
|-----------|--------------------------|-----------|--------------------------|-----------|--------------------------|
| T0 vs. T1 | ns                       | T0 vs. T1 | ns                       | T0 vs. T1 | ns                       |
| T0 vs. T2 | ns                       | T0 vs. T2 | ns                       | T0 vs. T2 | ns                       |
| T0 vs. T3 | ***                      | T0 vs. T3 | ns                       | T0 vs. T3 | ***                      |
| T0 vs. T4 | ***                      | T0 vs. T4 | ns                       | T0 vs. T4 | ***                      |
| T0 vs. T5 | ***                      | T0 vs. T5 | ns                       | T0 vs. T5 | ***                      |
| T1 vs. T2 | ns                       | T1 vs. T2 | ns                       | T1 vs. T2 | ns                       |
| T1 vs. T3 | ***                      | T1 vs. T3 | ns                       | T1 vs. T3 | ***                      |
| T1 vs. T4 | ***                      | T1 vs. T4 | ns                       | T1 vs. T4 | ***                      |
| T1 vs. T5 | ***                      | T1 vs. T5 | ns                       | T1 vs. T5 | ***                      |
| T2 vs. T3 | ***                      | T2 vs. T3 | ns                       | T2 vs. T3 | ***                      |
| T2 vs. T4 | ***                      | T2 vs. T4 | ns                       | T2 vs. T4 | ***                      |
| T2 vs. T5 | ***                      | T2 vs. T5 | ns                       | T2 vs. T5 | ***                      |

|           |     |
|-----------|-----|
| T3 vs. T4 | ns  |
| T3 vs. T5 | *** |
| T4 vs. T5 | ns  |

|           |    |
|-----------|----|
| T3 vs. T4 | ns |
| T3 vs. T5 | ns |
| T4 vs. T5 | ns |

|           |    |
|-----------|----|
| T3 vs. T4 | ns |
| T3 vs. T5 | ** |
| T4 vs. T5 | ns |

### C 18:3 n3

| P         | Statistical Significance |
|-----------|--------------------------|
| T0 vs. T1 | ns                       |
| T0 vs. T2 | ns                       |
| T0 vs. T3 | ns                       |
| T0 vs. T4 | ns                       |
| T0 vs. T5 | ns                       |
| T1 vs. T2 | ns                       |
| T1 vs. T3 | ns                       |
| T1 vs. T4 | ns                       |
| T1 vs. T5 | ns                       |
| T2 vs. T3 | ns                       |
| T2 vs. T4 | ns                       |
| T2 vs. T5 | ns                       |
| T3 vs. T4 | ns                       |
| T3 vs. T5 | ns                       |
| T4 vs. T5 | ns                       |

| S         | Statistical Significance |
|-----------|--------------------------|
| T0 vs. T1 | ***                      |
| T0 vs. T2 | ***                      |
| T0 vs. T3 | ***                      |
| T0 vs. T4 | ***                      |
| T0 vs. T5 | ***                      |
| T1 vs. T2 | ns                       |
| T1 vs. T3 | ns                       |
| T1 vs. T4 | ns                       |
| T1 vs. T5 | ***                      |
| T2 vs. T3 | ns                       |
| T2 vs. T4 | ns                       |
| T2 vs. T5 | ***                      |
| T3 vs. T4 | ns                       |
| T3 vs. T5 | ***                      |
| T4 vs. T5 | *                        |

| PL        | Statistical Significance |
|-----------|--------------------------|
| T0 vs. T1 | ***                      |
| T0 vs. T2 | ***                      |
| T0 vs. T3 | ***                      |
| T0 vs. T4 | ***                      |
| T0 vs. T5 | ***                      |
| T1 vs. T2 | ns                       |
| T1 vs. T3 | ns                       |
| T1 vs. T4 | ns                       |
| T1 vs. T5 | **                       |
| T2 vs. T3 | ns                       |
| T2 vs. T4 | ns                       |
| T2 vs. T5 | *                        |
| T3 vs. T4 | ns                       |
| T3 vs. T5 | *                        |
| T4 vs. T5 | ns                       |

### C 20:2 n6

| P         | Statistical Significance |
|-----------|--------------------------|
| T0 vs. T1 | **                       |
| T0 vs. T2 | **                       |
| T0 vs. T3 | ***                      |
| T0 vs. T4 | ***                      |
| T0 vs. T5 | ***                      |
| T1 vs. T2 | ns                       |
| T1 vs. T3 | ns                       |
| T1 vs. T4 | ns                       |
| T1 vs. T5 | ns                       |

| S         | Statistical Significance |
|-----------|--------------------------|
| T0 vs. T1 | ***                      |
| T0 vs. T2 | ***                      |
| T0 vs. T3 | ***                      |
| T0 vs. T4 | ***                      |
| T0 vs. T5 | ***                      |
| T1 vs. T2 | ns                       |
| T1 vs. T3 | ns                       |
| T1 vs. T4 | ns                       |
| T1 vs. T5 | ns                       |

| PL        | Statistical Significance |
|-----------|--------------------------|
| T0 vs. T1 | ***                      |
| T0 vs. T2 | ***                      |
| T0 vs. T3 | ***                      |
| T0 vs. T4 | ***                      |
| T0 vs. T5 | ***                      |
| T1 vs. T2 | ns                       |
| T1 vs. T3 | ns                       |
| T1 vs. T4 | ***                      |
| T1 vs. T5 | ***                      |

|           |    |
|-----------|----|
| T2 vs. T3 | ns |
| T2 vs. T4 | ns |
| T2 vs. T5 | ns |
| T3 vs. T4 | ns |
| T3 vs. T5 | ns |
| T4 vs. T5 | ns |

|           |    |
|-----------|----|
| T2 vs. T3 | ns |
| T2 vs. T4 | ns |
| T2 vs. T5 | ns |
| T3 vs. T4 | ns |
| T3 vs. T5 | ns |
| T4 vs. T5 | ns |

|           |     |
|-----------|-----|
| T2 vs. T3 | ns  |
| T2 vs. T4 | *** |
| T2 vs. T5 | *** |
| T3 vs. T4 | **  |
| T3 vs. T5 | *** |
| T4 vs. T5 | ns  |

### C 20:3 n6

| P         | Statistical Significance |
|-----------|--------------------------|
| T0 vs. T1 | ns                       |
| T0 vs. T2 | *                        |
| T0 vs. T3 | **                       |
| T0 vs. T4 | ***                      |
| T0 vs. T5 | ***                      |
| T1 vs. T2 | ns                       |
| T1 vs. T3 | ns                       |
| T1 vs. T4 | *                        |
| T1 vs. T5 | **                       |
| T2 vs. T3 | ns                       |
| T2 vs. T4 | *                        |
| T2 vs. T5 | *                        |
| T3 vs. T4 | ns                       |
| T3 vs. T5 | ns                       |
| T4 vs. T5 | ns                       |

| S         | Statistical Significance |
|-----------|--------------------------|
| T0 vs. T1 | ***                      |
| T0 vs. T2 | ***                      |
| T0 vs. T3 | ***                      |
| T0 vs. T4 | ***                      |
| T0 vs. T5 | ***                      |
| T1 vs. T2 | ns                       |
| T1 vs. T3 | ns                       |
| T1 vs. T4 | ns                       |
| T1 vs. T5 | ns                       |
| T2 vs. T3 | ns                       |
| T2 vs. T4 | ns                       |
| T2 vs. T5 | ns                       |
| T3 vs. T4 | ns                       |
| T3 vs. T5 | ns                       |
| T4 vs. T5 | ns                       |

| PL        | Statistical Significance |
|-----------|--------------------------|
| T0 vs. T1 | ***                      |
| T0 vs. T2 | ***                      |
| T0 vs. T3 | ***                      |
| T0 vs. T4 | ***                      |
| T0 vs. T5 | ***                      |
| T1 vs. T2 | ns                       |
| T1 vs. T3 | ns                       |
| T1 vs. T4 | *                        |
| T1 vs. T5 | **                       |
| T2 vs. T3 | ns                       |
| T2 vs. T4 | *                        |
| T2 vs. T5 | *                        |
| T3 vs. T4 | ns                       |
| T3 vs. T5 | *                        |
| T4 vs. T5 | ns                       |

### C 20:4 n6

| P         | Statistical Significance |
|-----------|--------------------------|
| T0 vs. T1 | *                        |
| T0 vs. T2 | **                       |
| T0 vs. T3 | **                       |
| T0 vs. T4 | ***                      |
| T0 vs. T5 | ***                      |
| T1 vs. T2 | ns                       |

| S         | Statistical Significance |
|-----------|--------------------------|
| T0 vs. T1 | ***                      |
| T0 vs. T2 | ***                      |
| T0 vs. T3 | ***                      |
| T0 vs. T4 | ***                      |
| T0 vs. T5 | ***                      |
| T1 vs. T2 | ns                       |

| PL        | Statistical Significance |
|-----------|--------------------------|
| T0 vs. T1 | ***                      |
| T0 vs. T2 | ***                      |
| T0 vs. T3 | ***                      |
| T0 vs. T4 | ***                      |
| T0 vs. T5 | ***                      |
| T1 vs. T2 | ns                       |



|           |    |
|-----------|----|
| T1 vs. T3 | ns |
| T1 vs. T4 | ns |
| T1 vs. T5 | ns |
| T2 vs. T3 | ns |
| T2 vs. T4 | ns |
| T2 vs. T5 | ns |
| T3 vs. T4 | ns |
| T3 vs. T5 | ns |
| T4 vs. T5 | ns |

|           |    |
|-----------|----|
| T1 vs. T3 | ns |
| T1 vs. T4 | ns |
| T1 vs. T5 | ns |
| T2 vs. T3 | ns |
| T2 vs. T4 | ns |
| T2 vs. T5 | ns |
| T3 vs. T4 | ns |
| T3 vs. T5 | ns |
| T4 vs. T5 | ns |

|           |    |
|-----------|----|
| T1 vs. T3 | ns |
| T1 vs. T4 | ns |
| T1 vs. T5 | ns |
| T2 vs. T3 | ns |
| T2 vs. T4 | ns |
| T2 vs. T5 | ns |
| T3 vs. T4 | ns |
| T3 vs. T5 | ns |
| T4 vs. T5 | ns |

### C 24:0

| P         | Statistical Significance |
|-----------|--------------------------|
| T0 vs. T1 | ***                      |
| T0 vs. T2 | ***                      |
| T0 vs. T3 | ***                      |
| T0 vs. T4 | ***                      |
| T0 vs. T5 | ***                      |
| T1 vs. T2 | **                       |
| T1 vs. T3 | ***                      |
| T1 vs. T4 | ***                      |
| T1 vs. T5 | ***                      |
| T2 vs. T3 | ***                      |
| T2 vs. T4 | ***                      |
| T2 vs. T5 | ***                      |
| T3 vs. T4 | ***                      |
| T3 vs. T5 | ***                      |
| T4 vs. T5 | **                       |

| S         | Statistical Significance |
|-----------|--------------------------|
| T0 vs. T1 | ns                       |
| T0 vs. T2 | ns                       |
| T0 vs. T3 | ns                       |
| T0 vs. T4 | ns                       |
| T0 vs. T5 | ns                       |
| T1 vs. T2 | ns                       |
| T1 vs. T3 | ns                       |
| T1 vs. T4 | ns                       |
| T1 vs. T5 | ns                       |
| T2 vs. T3 | ns                       |
| T2 vs. T4 | ns                       |
| T2 vs. T5 | ns                       |
| T3 vs. T4 | ns                       |
| T3 vs. T5 | ns                       |
| T4 vs. T5 | ns                       |

| PL        | Statistical Significance |
|-----------|--------------------------|
| T0 vs. T1 | ns                       |
| T0 vs. T2 | ns                       |
| T0 vs. T3 | ns                       |
| T0 vs. T4 | ns                       |
| T0 vs. T5 | ns                       |
| T1 vs. T2 | ns                       |
| T1 vs. T3 | ns                       |
| T1 vs. T4 | ns                       |
| T1 vs. T5 | ns                       |
| T2 vs. T3 | ns                       |
| T2 vs. T4 | ns                       |
| T2 vs. T5 | ns                       |
| T3 vs. T4 | ns                       |
| T3 vs. T5 | ns                       |
| T4 vs. T5 | ns                       |

### C 20:5 n3

| P         | Statistical Significance |
|-----------|--------------------------|
| T0 vs. T1 | ns                       |
| T0 vs. T2 | ns                       |
| T0 vs. T3 | ns                       |

| S         | Statistical Significance |
|-----------|--------------------------|
| T0 vs. T1 | ns                       |
| T0 vs. T2 | ns                       |
| T0 vs. T3 | ns                       |

| PL        | Statistical Significance |
|-----------|--------------------------|
| T0 vs. T1 | ***                      |
| T0 vs. T2 | ***                      |
| T0 vs. T3 | ***                      |

|           |    |
|-----------|----|
| T0 vs. T4 | ns |
| T0 vs. T5 | ns |
| T1 vs. T2 | ns |
| T1 vs. T3 | ns |
| T1 vs. T4 | ns |
| T1 vs. T5 | ns |
| T2 vs. T3 | ns |
| T2 vs. T4 | ns |
| T2 vs. T5 | ns |
| T3 vs. T4 | ns |
| T3 vs. T5 | ns |
| T4 vs. T5 | ns |

|           |    |
|-----------|----|
| T0 vs. T4 | ns |
| T0 vs. T5 | *  |
| T1 vs. T2 | ns |
| T1 vs. T3 | ns |
| T1 vs. T4 | ns |
| T1 vs. T5 | ns |
| T2 vs. T3 | ns |
| T2 vs. T4 | ns |
| T2 vs. T5 | ns |
| T3 vs. T4 | ns |
| T3 vs. T5 | ns |
| T4 vs. T5 | ns |

|           |     |
|-----------|-----|
| T0 vs. T4 | *** |
| T0 vs. T5 | *** |
| T1 vs. T2 | ns  |
| T1 vs. T3 | ns  |
| T1 vs. T4 | ns  |
| T1 vs. T5 | *   |
| T2 vs. T3 | ns  |
| T2 vs. T4 | ns  |
| T2 vs. T5 | ns  |
| T3 vs. T4 | ns  |
| T3 vs. T5 | ns  |
| T4 vs. T5 | ns  |

### C 24:1 n9

| P         | Statistical Significance |
|-----------|--------------------------|
| T0 vs. T1 | ns                       |
| T0 vs. T2 | ns                       |
| T0 vs. T3 | ns                       |
| T0 vs. T4 | ***                      |
| T0 vs. T5 | ***                      |
| T1 vs. T2 | ns                       |
| T1 vs. T3 | ns                       |
| T1 vs. T4 | ***                      |
| T1 vs. T5 | ***                      |
| T2 vs. T3 | ns                       |
| T2 vs. T4 | *                        |
| T2 vs. T5 | **                       |
| T3 vs. T4 | ns                       |
| T3 vs. T5 | ns                       |
| T4 vs. T5 | ns                       |

| S         | Statistical Significance |
|-----------|--------------------------|
| T0 vs. T1 | ns                       |
| T0 vs. T2 | **                       |
| T0 vs. T3 | ***                      |
| T0 vs. T4 | ***                      |
| T0 vs. T5 | ***                      |
| T1 vs. T2 | ns                       |
| T1 vs. T3 | *                        |
| T1 vs. T4 | ***                      |
| T1 vs. T5 | ***                      |
| T2 vs. T3 | ns                       |
| T2 vs. T4 | *                        |
| T2 vs. T5 | **                       |
| T3 vs. T4 | ns                       |
| T3 vs. T5 | ns                       |
| T4 vs. T5 | ns                       |

| PL        | Statistical Significance |
|-----------|--------------------------|
| T0 vs. T1 | ns                       |
| T0 vs. T2 | ns                       |
| T0 vs. T3 | ns                       |
| T0 vs. T4 | ***                      |
| T0 vs. T5 | ***                      |
| T1 vs. T2 | ns                       |
| T1 vs. T3 | ns                       |
| T1 vs. T4 | *                        |
| T1 vs. T5 | ***                      |
| T2 vs. T3 | ns                       |
| T2 vs. T4 | *                        |
| T2 vs. T5 | ***                      |
| T3 vs. T4 | ns                       |
| T3 vs. T5 | ***                      |
| T4 vs. T5 | ns                       |

### C 22:6 n3

| P | Statistical Significance |
|---|--------------------------|
|---|--------------------------|

| S | Statistical Significance |
|---|--------------------------|
|---|--------------------------|

| PL | Statistical Significance |
|----|--------------------------|
|----|--------------------------|

|           |     |           |     |           |    |
|-----------|-----|-----------|-----|-----------|----|
| T0 vs. T1 | ns  | T0 vs. T1 | *** | T0 vs. T1 | ns |
| T0 vs. T2 | ns  | T0 vs. T2 | *** | T0 vs. T2 | ns |
| T0 vs. T3 | ns  | T0 vs. T3 | *** | T0 vs. T3 | ns |
| T0 vs. T4 | *   | T0 vs. T4 | *** | T0 vs. T4 | ns |
| T0 vs. T5 | *** | T0 vs. T5 | *** | T0 vs. T5 | *  |
| T1 vs. T2 | ns  | T1 vs. T2 | ns  | T1 vs. T2 | ns |
| T1 vs. T3 | ns  | T1 vs. T3 | ns  | T1 vs. T3 | ns |
| T1 vs. T4 | *   | T1 vs. T4 | ns  | T1 vs. T4 | ns |
| T1 vs. T5 | **  | T1 vs. T5 | ns  | T1 vs. T5 | ns |
| T2 vs. T3 | ns  | T2 vs. T3 | ns  | T2 vs. T3 | ns |
| T2 vs. T4 | *   | T2 vs. T4 | ns  | T2 vs. T4 | ns |
| T2 vs. T5 | **  | T2 vs. T5 | ns  | T2 vs. T5 | ns |
| T3 vs. T4 | ns  | T3 vs. T4 | ns  | T3 vs. T4 | ns |
| T3 vs. T5 | ns  | T3 vs. T5 | ns  | T3 vs. T5 | ns |
| T4 vs. T5 | ns  | T4 vs. T5 | ns  | T4 vs. T5 | ns |

---

#### SFA

| P         | Statistical Significance | S         | Statistical Significance | PL        | Statistical Significance |
|-----------|--------------------------|-----------|--------------------------|-----------|--------------------------|
| T0 vs. T1 | *                        | T0 vs. T1 | ***                      | T0 vs. T1 | ***                      |
| T0 vs. T2 | ***                      | T0 vs. T2 | ***                      | T0 vs. T2 | ***                      |
| T0 vs. T3 | ***                      | T0 vs. T3 | ***                      | T0 vs. T3 | ***                      |
| T0 vs. T4 | ***                      | T0 vs. T4 | ***                      | T0 vs. T4 | ***                      |
| T0 vs. T5 | ***                      | T0 vs. T5 | ***                      | T0 vs. T5 | ***                      |
| T1 vs. T2 | ns                       | T1 vs. T2 | ***                      | T1 vs. T2 | ns                       |
| T1 vs. T3 | ***                      | T1 vs. T3 | ***                      | T1 vs. T3 | ***                      |
| T1 vs. T4 | ***                      | T1 vs. T4 | ***                      | T1 vs. T4 | ***                      |
| T1 vs. T5 | ***                      | T1 vs. T5 | ***                      | T1 vs. T5 | ***                      |
| T2 vs. T3 | ***                      | T2 vs. T3 | ***                      | T2 vs. T3 | ***                      |
| T2 vs. T4 | ***                      | T2 vs. T4 | ***                      | T2 vs. T4 | ***                      |
| T2 vs. T5 | ***                      | T2 vs. T5 | ***                      | T2 vs. T5 | ***                      |
| T3 vs. T4 | **                       | T3 vs. T4 | ***                      | T3 vs. T4 | ***                      |
| T3 vs. T5 | ***                      | T3 vs. T5 | ***                      | T3 vs. T5 | ***                      |
| T4 vs. T5 | ns                       | T4 vs. T5 | ns                       | T4 vs. T5 | ***                      |

**MUFA**

| P         | Statistical Significance | S         | Statistical Significance | PL        | Statistical Significance |
|-----------|--------------------------|-----------|--------------------------|-----------|--------------------------|
| T0 vs. T1 | ***                      | T0 vs. T1 | ***                      | T0 vs. T1 | ***                      |
| T0 vs. T2 | ***                      | T0 vs. T2 | ***                      | T0 vs. T2 | ***                      |
| T0 vs. T3 | ***                      | T0 vs. T3 | ***                      | T0 vs. T3 | ***                      |
| T0 vs. T4 | ***                      | T0 vs. T4 | ***                      | T0 vs. T4 | ***                      |
| T0 vs. T5 | ***                      | T0 vs. T5 | ***                      | T0 vs. T5 | ***                      |
| T1 vs. T2 | ***                      | T1 vs. T2 | ***                      | T1 vs. T2 | ***                      |
| T1 vs. T3 | ***                      | T1 vs. T3 | ***                      | T1 vs. T3 | ***                      |
| T1 vs. T4 | ***                      | T1 vs. T4 | ***                      | T1 vs. T4 | ***                      |
| T1 vs. T5 | ***                      | T1 vs. T5 | ***                      | T1 vs. T5 | ***                      |
| T2 vs. T3 | ***                      | T2 vs. T3 | ***                      | T2 vs. T3 | ***                      |
| T2 vs. T4 | ***                      | T2 vs. T4 | ***                      | T2 vs. T4 | ***                      |
| T2 vs. T5 | ***                      | T2 vs. T5 | ***                      | T2 vs. T5 | ***                      |
| T3 vs. T4 | ***                      | T3 vs. T4 | ***                      | T3 vs. T4 | ***                      |
| T3 vs. T5 | ***                      | T3 vs. T5 | ***                      | T3 vs. T5 | ***                      |
| T4 vs. T5 | ***                      | T4 vs. T5 | ***                      | T4 vs. T5 | ***                      |

**PUFA**

| P         | Statistical Significance | S         | Statistical Significance | PL        | Statistical Significance |
|-----------|--------------------------|-----------|--------------------------|-----------|--------------------------|
| T0 vs. T1 | ***                      | T0 vs. T1 | ***                      | T0 vs. T1 | ***                      |
| T0 vs. T2 | ***                      | T0 vs. T2 | ***                      | T0 vs. T2 | ***                      |
| T0 vs. T3 | ***                      | T0 vs. T3 | ***                      | T0 vs. T3 | ***                      |
| T0 vs. T4 | ***                      | T0 vs. T4 | ***                      | T0 vs. T4 | ***                      |
| T0 vs. T5 | ***                      | T0 vs. T5 | ***                      | T0 vs. T5 | ***                      |
| T1 vs. T2 | ns                       | T1 vs. T2 | ns                       | T1 vs. T2 | ***                      |
| T1 vs. T3 | ***                      | T1 vs. T3 | ***                      | T1 vs. T3 | ***                      |
| T1 vs. T4 | ***                      | T1 vs. T4 | ***                      | T1 vs. T4 | ***                      |
| T1 vs. T5 | ***                      | T1 vs. T5 | ***                      | T1 vs. T5 | ***                      |
| T2 vs. T3 | ***                      | T2 vs. T3 | ***                      | T2 vs. T3 | ***                      |
| T2 vs. T4 | ***                      | T2 vs. T4 | ***                      | T2 vs. T4 | ***                      |
| T2 vs. T5 | ***                      | T2 vs. T5 | ***                      | T2 vs. T5 | ***                      |

|           |     |           |     |           |     |
|-----------|-----|-----------|-----|-----------|-----|
| T3 vs. T4 | *** | T3 vs. T4 | *** | T3 vs. T4 | *** |
| T3 vs. T5 | *** | T3 vs. T5 | *** | T3 vs. T5 | *** |
| T4 vs. T5 | *   | T4 vs. T5 | *** | T4 vs. T5 | *** |

---

Abbreviations: P, Primiparous; S, Secondiparous; PL, Pluriparous.  
 Statisical significance \*\*\*p<0.001; \*\*p<0.01; \*p<0.05
